# Supplementary material for: Effect of Heart Rate on 1‐Year Outcome for Patients With Acute Ischemic Stroke
Source: PubMed Central journal article supplement — J Am Heart Assoc. 2022 May 10;11(10):e025861. doi: 10.1161/JAHA.122.025861 (PMC9238577; doi:10.1161/jaha.122.025861), 2022-05-10

# **SUPPLEMENTAL MATERIAL**

## **CRCS-K Investigators and their affiliations**

Beom Joon Kim, MD, PhD (Seoul National University Bundang Hospital, site investigator); Hee-Joon Bae, MD, PhD (Seoul National University Bundang Hospital, site investigator); Moon-Ku Han, MD, PhD (Seoul National University Bundang Hospital; site investigator); Jihoon Kang, MD (Seoul National University Bundang Hospital; site investigator); Joon-Tae Kim, MD, PhD (Chonnam National University Hospital, site investigator); Ki-Hyun Cho, MD, PhD (Chonnam National University Hospital, site investigator); Man-Seok Park, MD, PhD (Chonnam National University Hospital, site investigator); Kang-Ho Choi, MD (Chonnam National University Hospital, site investigator); Dong-Ick Shin, MD, PhD (Chungbuk National University Hospital, site investigator); Kyu Sun Yum, MD (Chungbuk National University Hospital, site investigator); Jae-Kwan Cha, MD, PhD (Dong-A University Hospital, site investigator); Dae-Hyun Kim, MD, PhD (Dong-A University Hospital, site investigator); Dong-Eog Kim, MD, PhD (Dongguk University Ilsan Hospital, site investigator); Wi-Sun Ryu, MD, PhD (Dongguk University Ilsan Hospital, site investigator); Jong-Moo Park, MD, PhD (Uijeongbu Eulji Hospital, site investigator); Kyusik Kang, MD, PhD (Eulji General Hospital, site investigator); Soo Joo Lee, MD, PhD (Eulji University Hospital, site investigator); Jae Guk Kim, MD (Eulji University Hospital, site investigator); Mi-Sun Oh, MD, PhD (Hallym University Sacred Heart Hospital, site investigator); Kyung-Ho Yu, MD, PhD (Hallym University Sacred Heart Hospital, site investigator); Byung-Chul Lee, MD, PhD (Hallym University Sacred Heart Hospital, site investigator); Keun-Sik Hong, MD, PhD (Inje University Ilsan Paik Hospital, site investigator); Yong-Jin Cho, MD, PhD (Inje University Ilsan Paik Hospital, site investigator); Hong-Kyun Park, MD (Inje University Ilsan Paik

Hospital, site investigator); Jay Chol Choi, MD, PhD (Jeju National University Hospital, site investigator); Joong-Goo Kim, MD (Jeju National University Hospital, site investigator); Sung-Il Sohn, MD, PhD (Keimyung University Dongsan Medical Center, site investigator); Jeong-Ho Hong, MD, PhD (Keimyung University Dongsan Medical Center, site investigator); Hyungjong Park, MD (Keimyung University Dongsan Medical Center, site investigator); Tai Hwan Park, MD, PhD (Seoul Medical Center, site investigator); Sang-Soon Park, MD (Seoul Medical Center, site investigator); Jee-Hyun Kwon, MD, PhD (Ulsan University Hospital, site investigator); Wook-Joo Kim, MD (Ulsan University Hospital, site investigator); Kyung Bok Lee, MD, PhD (Soon Chun Hyang University Hospital, site investigator); Jun Lee, MD, PhD (Yeungnam University Medical Center, site investigator); Min Uk Jang, MD, (Hallym University Dongtan Sacred Heart Hospital, site investigator); Sang-Hwa Kee, MD, PhD (Hallym University Chuncheon Sacred Heart Hospital, site investigator); Kwang Yeol Park, (Chung-Ang University Hospital, site investigator); Ji Sung Lee, PhD (Asan Medical Center, statistical analysis), Juneyoung Lee, PhD (Korea University, statistical analysis and data management)

**Table S1. Cumulative incidence of outcomes by mean heart rate deciles**

|                                                                               | Cumulative incidence (%) (95% CI) |                       |                       |                       |
|-------------------------------------------------------------------------------|-----------------------------------|-----------------------|-----------------------|-----------------------|
|                                                                               | Day 23                            | Day 83                | Day 173               | Day 358               |
| Composite of stroke recurrence, myocardial infarction and all-cause mortality |                                   |                       |                       |                       |
| 1 <sup>st</sup> decile                                                        | 1.77 (0.85 - 2.69)                | 4.34 (2.91 - 5.77)    | 6.20 (4.50 - 7.90)    | 7.82 (5.92 - 9.72)    |
| 2 <sup>nd</sup> decile                                                        | 2.13 (1.13 - 3.13)                | 4.28 (2.87 - 5.69)    | 5.97 (4.32 - 7.63)    | 8.15 (6.21 - 10.08)   |
| 3 <sup>rd</sup> decile                                                        | 1.52 (0.66 - 2.37)                | 3.68 (2.37 - 5.00)    | 5.39 (3.81 - 6.98)    | 8.88 (6.84 - 10.91)   |
| 4 <sup>th</sup> decile                                                        | 2.02 (1.04 - 3.00)                | 3.92 (2.57 - 5.28)    | 5.49 (3.89 - 7.09)    | 6.95 (5.16 - 8.74)    |
| 5 <sup>th</sup> decile                                                        | 2.04 (1.05 - 3.02)                | 5.40 (3.81 - 6.98)    | 6.75 (4.98 - 8.52)    | 9.83 (7.70 - 11.97)   |
| 6 <sup>th</sup> decile                                                        | 3.05 (1.85 - 4.25)                | 7.29 (5.47 - 9.11)    | 10.18 (8.05 - 12.31)  | 12.87 (10.50 - 15.24) |
| 7 <sup>th</sup> decile                                                        | 2.77 (1.63 - 3.91)                | 7.36 (5.54 - 9.18)    | 10.13 (8.01 - 12.25)  | 14.02 (11.56 - 16.48) |
| 8 <sup>th</sup> decile                                                        | 3.67 (2.36 - 4.98)                | 7.01 (5.22 - 8.80)    | 10.52 (8.35 - 12.69)  | 14.91 (12.35 - 17.47) |
| 9 <sup>th</sup> decile                                                        | 6.04 (4.39 - 7.70)                | 13.16 (10.79 - 15.53) | 17.65 (14.95 - 20.35) | 23.38 (20.35 - 26.41) |
| 10 <sup>th</sup> decile                                                       | 12.74 (10.42 - 15.07)             | 25.09 (22.05 - 28.12) | 32.20 (28.91 - 35.50) | 38.68 (35.21 - 42.14) |
| All-cause mortality                                                           |                                   |                       |                       |                       |
| 1 <sup>st</sup> decile                                                        | 0.88 (0.23 - 1.53)                | 2.68 (1.55 - 3.81)    | 4.14 (2.74 - 5.55)    | 5.09 (3.53 - 6.64)    |
| 2 <sup>nd</sup> decile                                                        | 1.13 (0.40 - 1.87)                | 2.02 (1.04 - 2.99)    | 2.93 (1.75 - 4.11)    | 4.61 (3.11 - 6.11)    |
| 3 <sup>rd</sup> decile                                                        | 0.88 (0.23 - 1.54)                | 2.67 (1.54 - 3.80)    | 3.72 (2.39 - 5.05)    | 6.05 (4.35 - 7.75)    |
| 4 <sup>th</sup> decile                                                        | 0.76 (0.15 - 1.36)                | 1.64 (0.76 - 2.53)    | 3.21 (1.97 - 4.45)    | 4.01 (2.62 - 5.39)    |
| 5 <sup>th</sup> decile                                                        | 1.02 (0.32 - 1.72)                | 2.96 (1.77 - 4.15)    | 3.91 (2.54 - 5.28)    | 6.30 (4.55 - 8.04)    |
| 6 <sup>th</sup> decile                                                        | 1.78 (0.86 - 2.71)                | 4.99 (3.47 - 6.52)    | 6.96 (5.17 - 8.75)    | 8.83 (6.83 - 10.84)   |
| 7 <sup>th</sup> decile                                                        | 1.64 (0.75 - 2.52)                | 5.08 (3.55 - 6.62)    | 7.33 (5.50 - 9.16)    | 10.56 (8.38 - 12.74)  |
| 8 <sup>th</sup> decile                                                        | 2.66 (1.54 - 3.78)                | 5.10 (3.56 - 6.64)    | 7.66 (5.78 - 9.54)    | 11.64 (9.33 - 13.94)  |
| 9 <sup>th</sup> decile                                                        | 5.29 (3.73 - 6.85)                | 11.89 (9.62 - 14.16)  | 15.56 (13.00 - 18.12) | 20.76 (17.85 - 23.66) |
| 10 <sup>th</sup> decile                                                       | 11.98 (9.72 - 14.24)              | 23.44 (20.47 - 26.40) | 30.98 (27.71 - 34.25) | 36.76 (33.33 - 40.18) |

|                                                                          |                    |                    |                     |                      |
|--------------------------------------------------------------------------|--------------------|--------------------|---------------------|----------------------|
| Stroke recurrence                                                        |                    |                    |                     |                      |
| 1 <sup>st</sup> decile                                                   | 0.89 (0.23 - 1.55) | 1.81 (0.87 - 2.75) | 2.22 (1.18 - 3.27)  | 3.07 (1.83 - 4.30)   |
| 2 <sup>nd</sup> decile                                                   | 1.00 (0.31 - 1.69) | 2.41 (1.34 - 3.48) | 3.34 (2.08 - 4.61)  | 4.32 (2.88 - 5.77)   |
| 3 <sup>rd</sup> decile                                                   | 0.89 (0.23 - 1.54) | 1.41 (0.58 - 2.24) | 2.08 (1.07 - 3.09)  | 3.60 (2.23 - 4.97)   |
| 4 <sup>th</sup> decile                                                   | 1.39 (0.58 - 2.21) | 2.42 (1.34 - 3.49) | 2.55 (1.45 - 3.66)  | 3.38 (2.10 - 4.66)   |
| 5 <sup>th</sup> decile                                                   | 1.15 (0.40 - 1.89) | 2.73 (1.58 - 3.89) | 3.44 (2.14 - 4.74)  | 4.17 (2.73 - 5.61)   |
| 6 <sup>th</sup> decile                                                   | 1.28 (0.49 - 2.06) | 2.74 (1.58 - 3.89) | 3.99 (2.59 - 5.39)  | 4.88 (3.32 - 6.44)   |
| 7 <sup>th</sup> decile                                                   | 1.14 (0.40 - 1.88) | 2.32 (1.26 - 3.38) | 3.15 (1.91 - 4.40)  | 4.02 (2.61 - 5.43)   |
| 8 <sup>th</sup> decile                                                   | 0.90 (0.23 - 1.56) | 1.84 (0.88 - 2.79) | 3.14 (1.87 - 4.40)  | 3.73 (2.35 - 5.12)   |
| 9 <sup>th</sup> decile                                                   | 1.41 (0.58 - 2.24) | 2.52 (1.40 - 3.64) | 3.30 (2.00 - 4.60)  | 5.14 (3.46 - 6.81)   |
| 10 <sup>th</sup> decile                                                  | 1.23 (0.43 - 2.03) | 2.49 (1.32 - 3.66) | 3.57 (2.13 - 5.02)  | 5.26 (3.42 - 7.09)   |
| Composite of stroke recurrence, myocardial infarction and vascular death |                    |                    |                     |                      |
| 1st decile                                                               | 1.39 (0.58 - 2.21) | 2.56 (1.45 - 3.67) | 3.38 (2.10 - 4.65)  | 4.21 (2.78 - 5.64)   |
| 2nd decile                                                               | 1.26 (0.48 - 2.03) | 2.54 (1.44 - 3.63) | 3.73 (2.40 - 5.06)  | 4.71 (3.20 - 6.21)   |
| 3rd decile                                                               | 0.76 (0.15 - 1.37) | 1.54 (0.67 - 2.40) | 2.21 (1.17 - 3.25)  | 4.00 (2.56 - 5.44)   |
| 4th decile                                                               | 1.64 (0.76 - 2.53) | 2.79 (1.64 - 3.94) | 3.32 (2.07 - 4.58)  | 4.28 (2.85 - 5.72)   |
| 5th decile                                                               | 1.40 (0.58 - 2.22) | 3.12 (1.89 - 4.34) | 3.82 (2.45 - 5.18)  | 4.69 (3.17 - 6.21)   |
| 6th decile                                                               | 1.66 (0.77 - 2.56) | 3.11 (1.89 - 4.34) | 4.50 (3.02 - 5.98)  | 5.53 (3.88 - 7.18)   |
| 7th decile                                                               | 1.26 (0.48 - 2.04) | 3.09 (1.87 - 4.31) | 3.93 (2.55 - 5.31)  | 5.36 (3.74 - 6.97)   |
| 8th decile                                                               | 1.90 (0.95 - 2.85) | 3.09 (1.87 - 4.31) | 4.66 (3.15 - 6.17)  | 5.40 (3.77 - 7.03)   |
| 9th decile                                                               | 3.53 (2.25 - 4.82) | 5.43 (3.83 - 7.03) | 6.50 (4.73 - 8.26)  | 8.76 (6.67 - 10.84)  |
| 10th decile                                                              | 5.19 (3.62 - 6.76) | 7.97 (6.01 - 9.93) | 9.34 (7.19 - 11.48) | 10.92 (8.55 - 13.30) |

**Table S2. Piecewise hazard ratios for the primary outcome before and after 30 days since outcome ascertainment**

| Heart rate parameter                                   | Time from outcome ascertainment |         |                          |         |
|--------------------------------------------------------|---------------------------------|---------|--------------------------|---------|
|                                                        | 0 to 30 days                    |         | 31 to 358 days           |         |
|                                                        | Adjusted HR*<br>(95% CI)        | P-value | Adjusted HR*<br>(95% CI) | P-value |
| Mean heart rate (per 10 bpm increase)                  | 1.31 (1.23-1.40)                | <.0001  | 1.24 (1.18-1.31)         | <.0001  |
| Time-weighted average heart rate (per 10 bpm increase) | 1.33 (1.24-1.42)                | <.0001  | 1.26 (1.19-1.33)         | <.0001  |
| Maximum heart rate (per 10 bpm increase)               | 1.17 (1.13-1.21)                | <.0001  | 1.12 (1.09-1.15)         | <.0001  |
| Minimum heart rate (per 10 bpm increase)               | 1.16 (1.07-1.27)                | 0.0004  | 1.13 (1.06-1.21)         | 0.0002  |

\* Derived from multivariable time dependent Cox model. HR, hazard ratio; CI, confidence interval; SBP, systolic blood pressure. Predetermined covariates included age, sex, time from symptom onset to hospital arrival, initial stroke severity, history of hypertension, diabetes, dyslipidemia, coronary artery disease, heart failure, previous history of stroke or transient ischemia attack, premorbid modified Rankin's scale, current smoking, whether the patient received recanalization therapy (intravenous thrombolysis or endovascular treatment), antithrombotic (antiplatelet agents and/or anticoagulants) and statin administration at discharge, symptomatic steno-occlusion of the intra- or extracranial major cerebral arteries, initial SBP, mean value of SBP between the 4<sup>th</sup> and 7<sup>th</sup> days after symptom onset, initial glucose level, and ischemic stroke subtype.

**Figure S1. Patient selection**

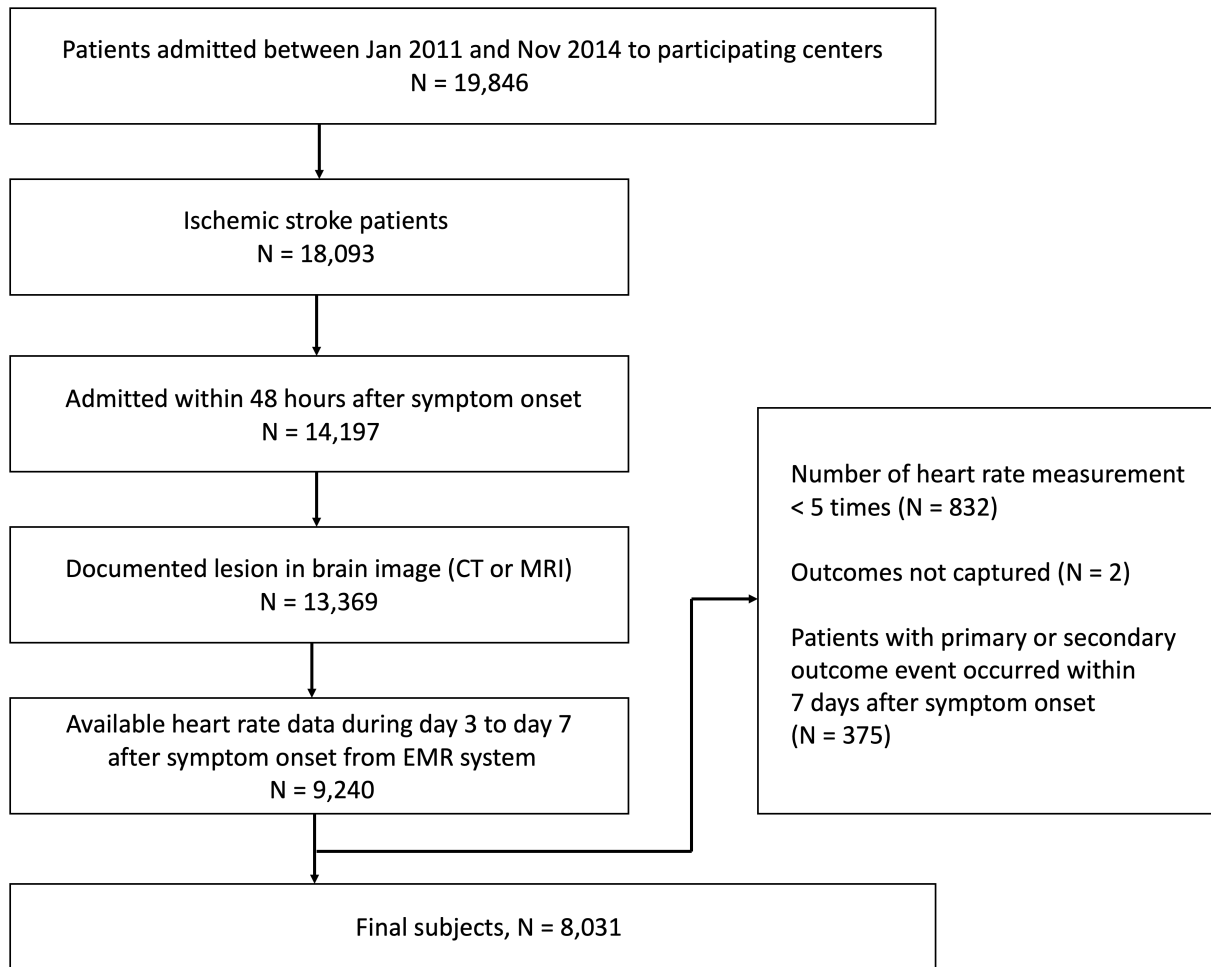

**Figure S2. Histogram of heart rate parameters**

(A) Mean heart rate (B) time weighted average heart rate (C) Maximum heart rate (D) Minimum heart rate

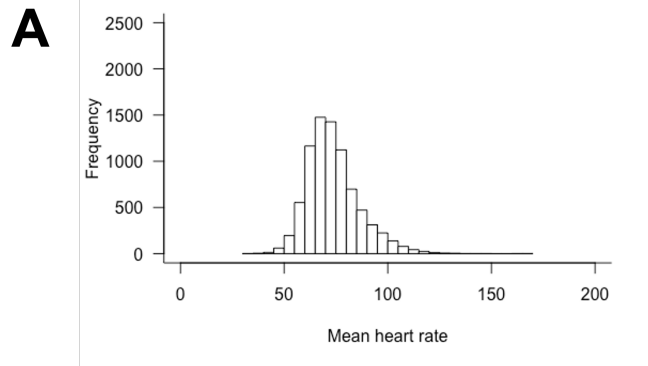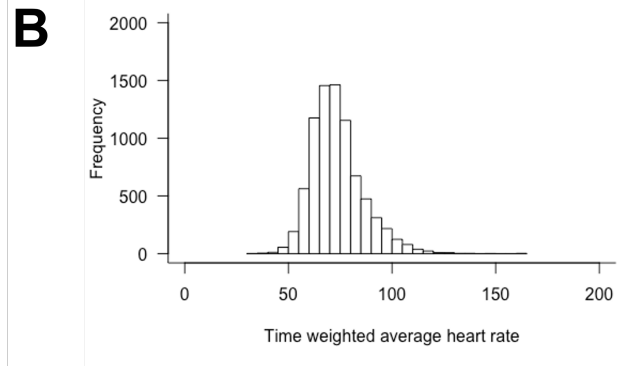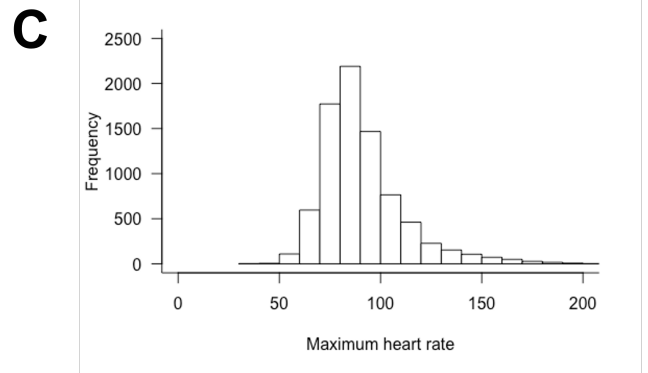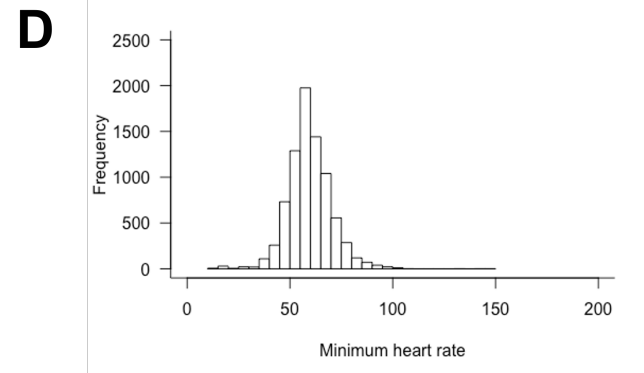



Figure S3. Association between heart rate parameters and primary outcome (A) and all-cause mortality (B) according to mean systolic blood pressure level during day 4 to day 7 after stroke onset

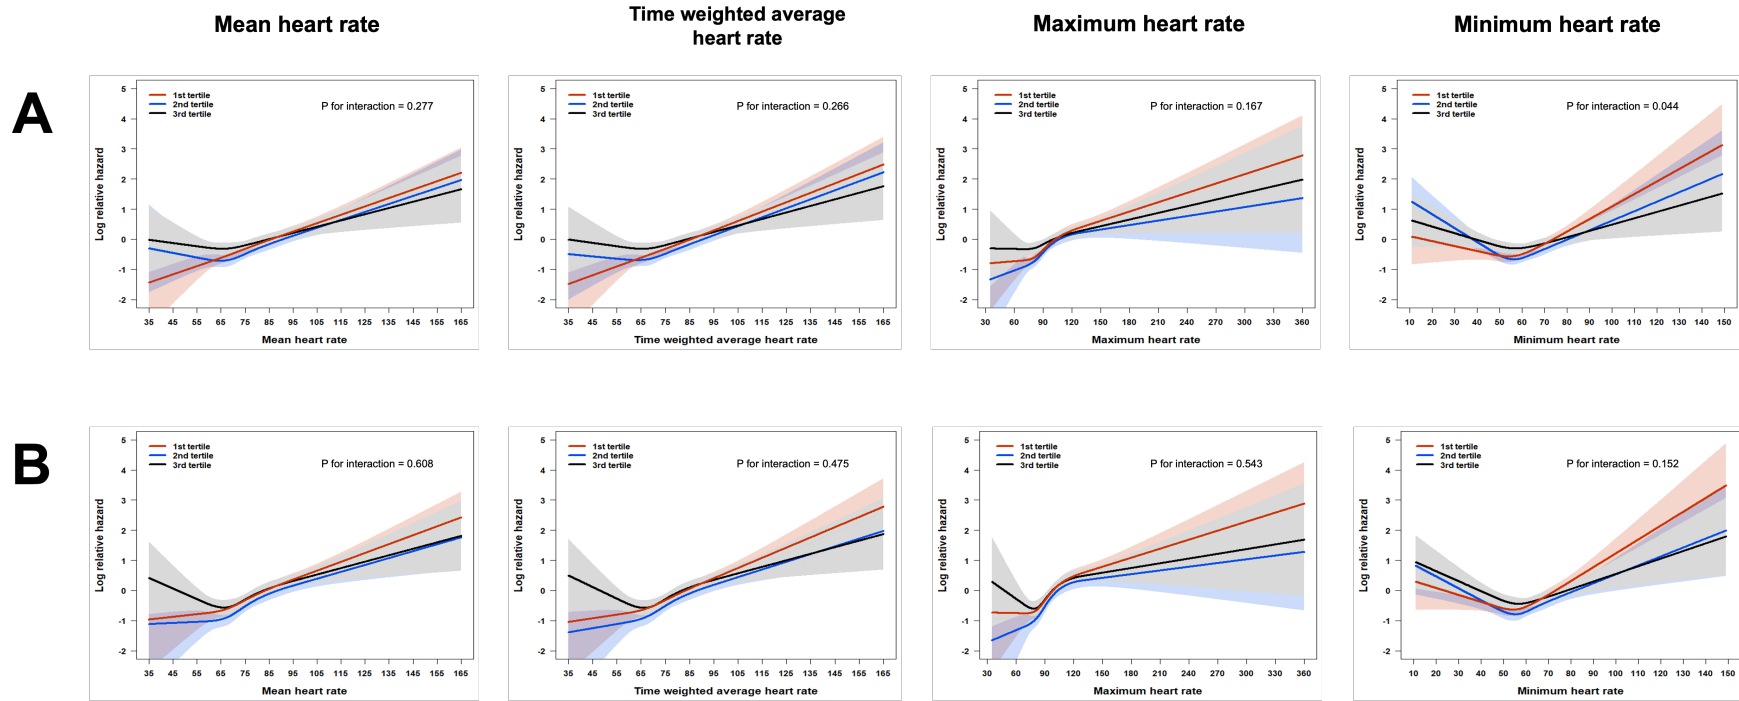

Figure S4. Association between heart rate parameters and primary outcome (A) and all-cause mortality (B) in patients with and without hypertension

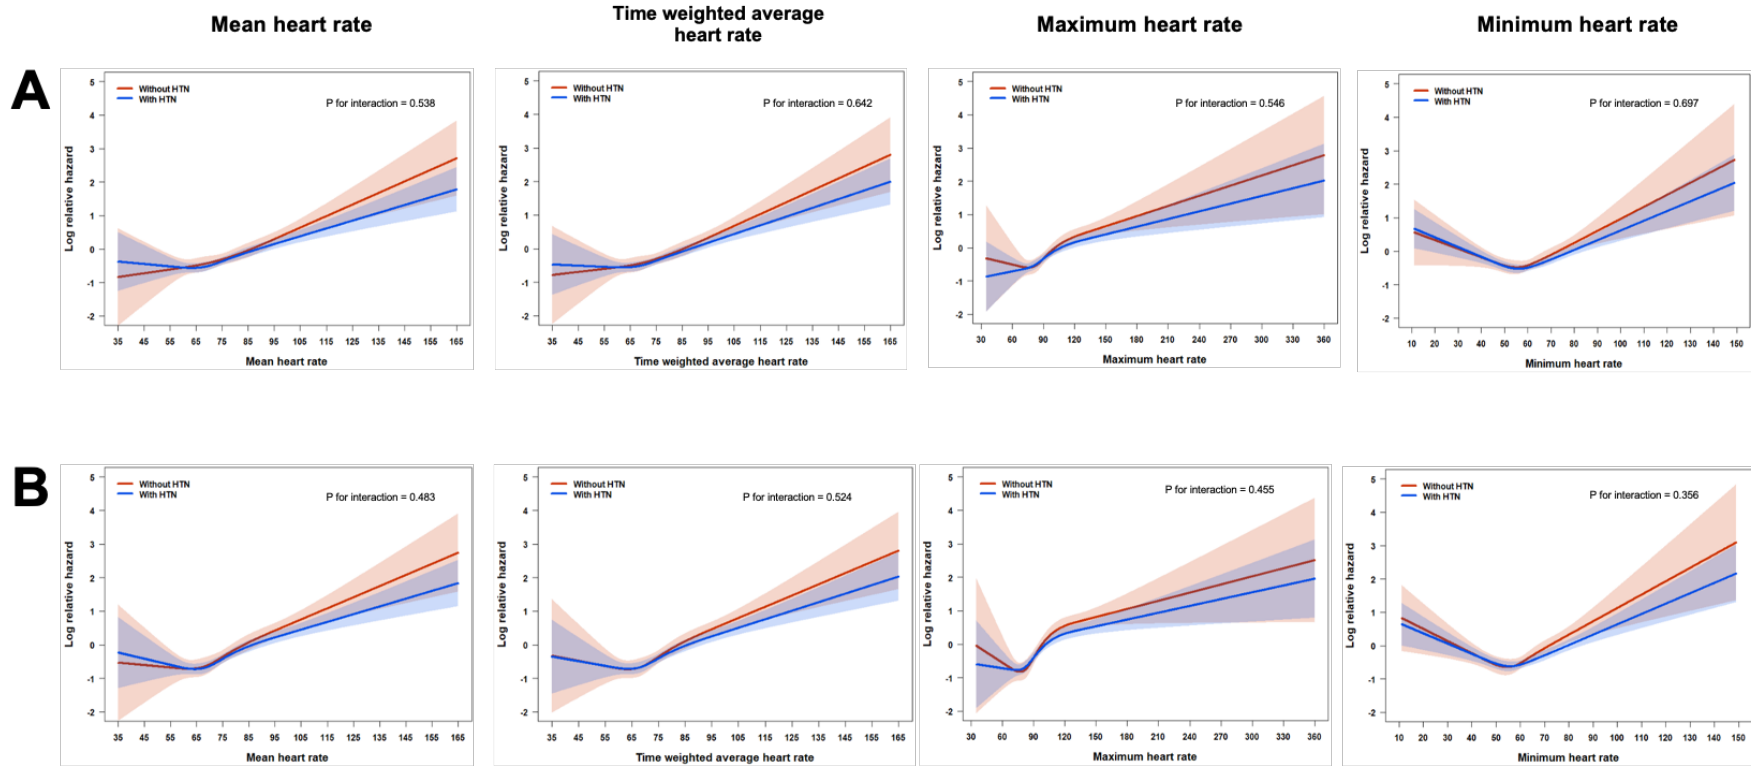

Figure S5. Association between heart rate parameters and primary outcome (A) and all-cause mortality (B) in patients with and without atrial fibrillation

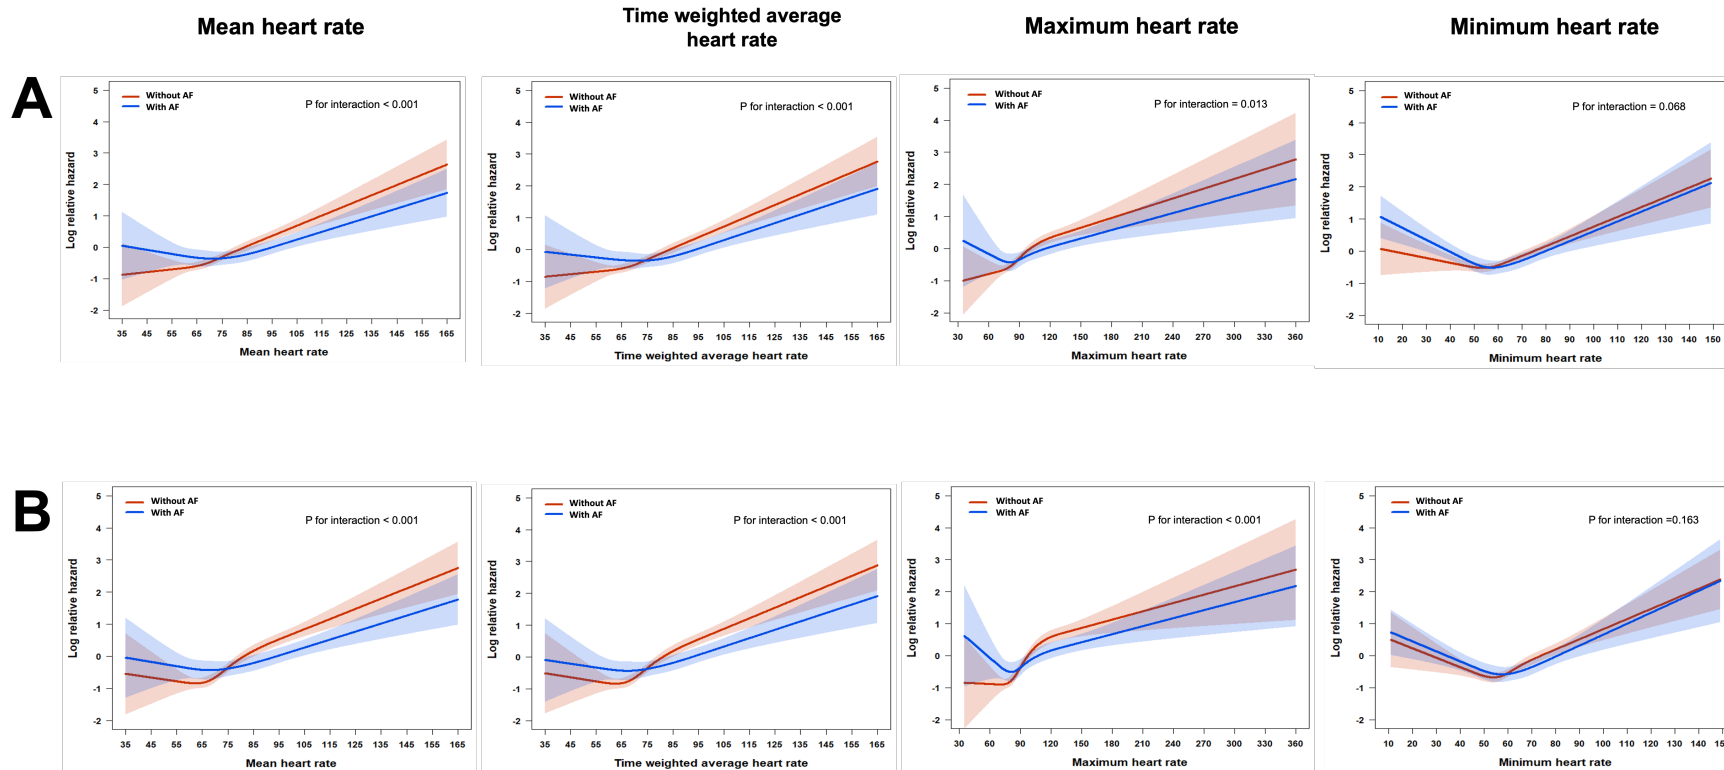

Figure S6. Association between heart rate parameters and primary outcome (A) and all-cause mortality (B) in patients with age older than 70 years and 70 years or younger

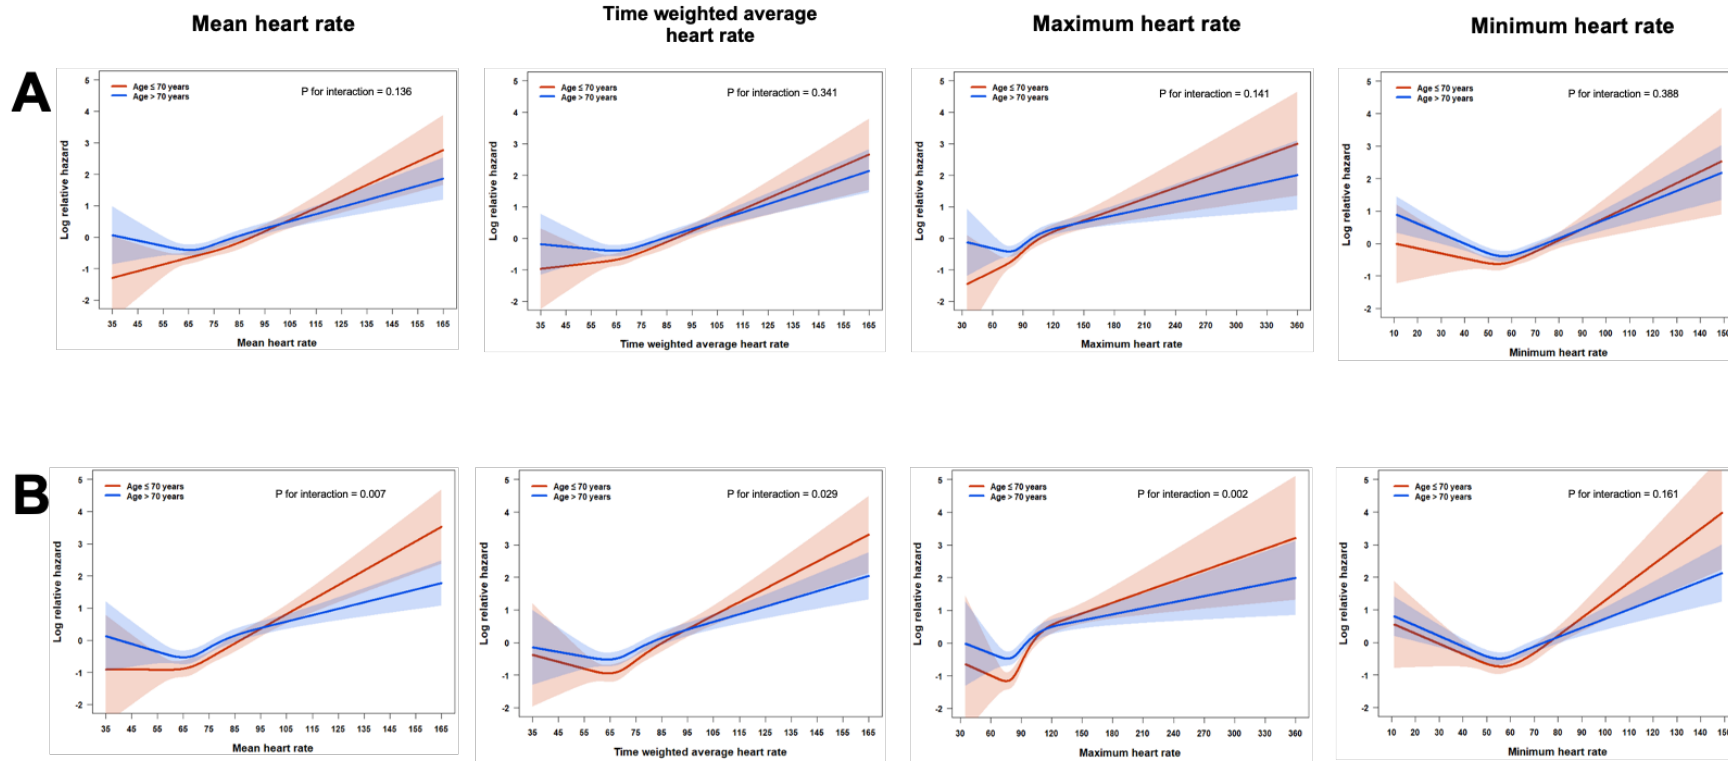

**Figure S7. Kaplan-Meier survival curve and piecewise hazard ratios for the primary outcome before and after 30 days since outcome ascertainment according to heart rate cutoffs**

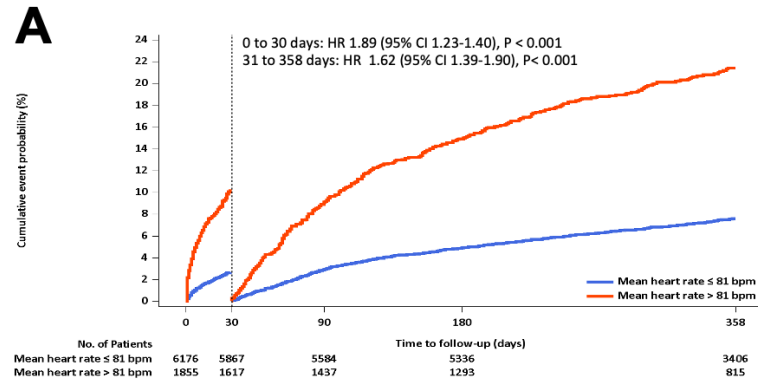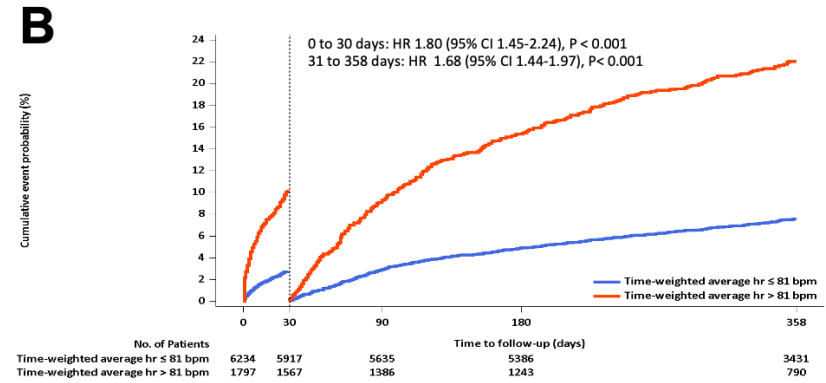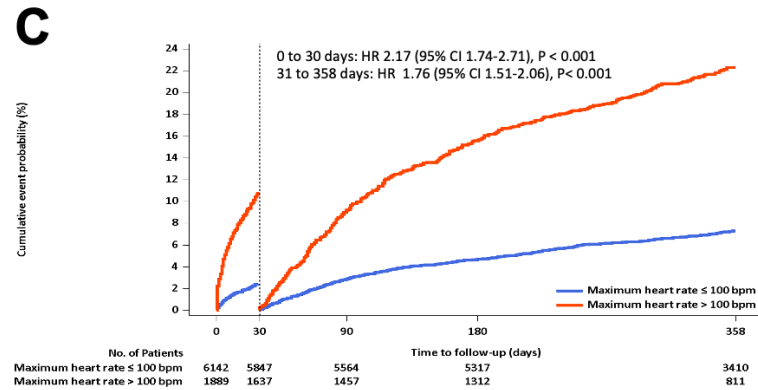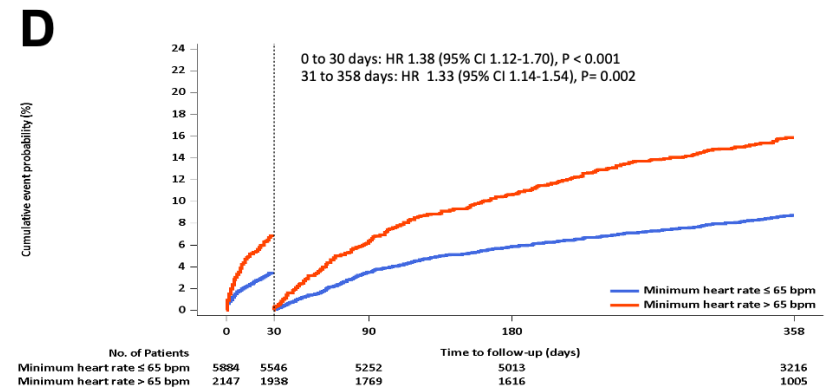

Figure S8. Association between heart rate parameters and primary outcome (A) and all-cause mortality (B) in the validation dataset

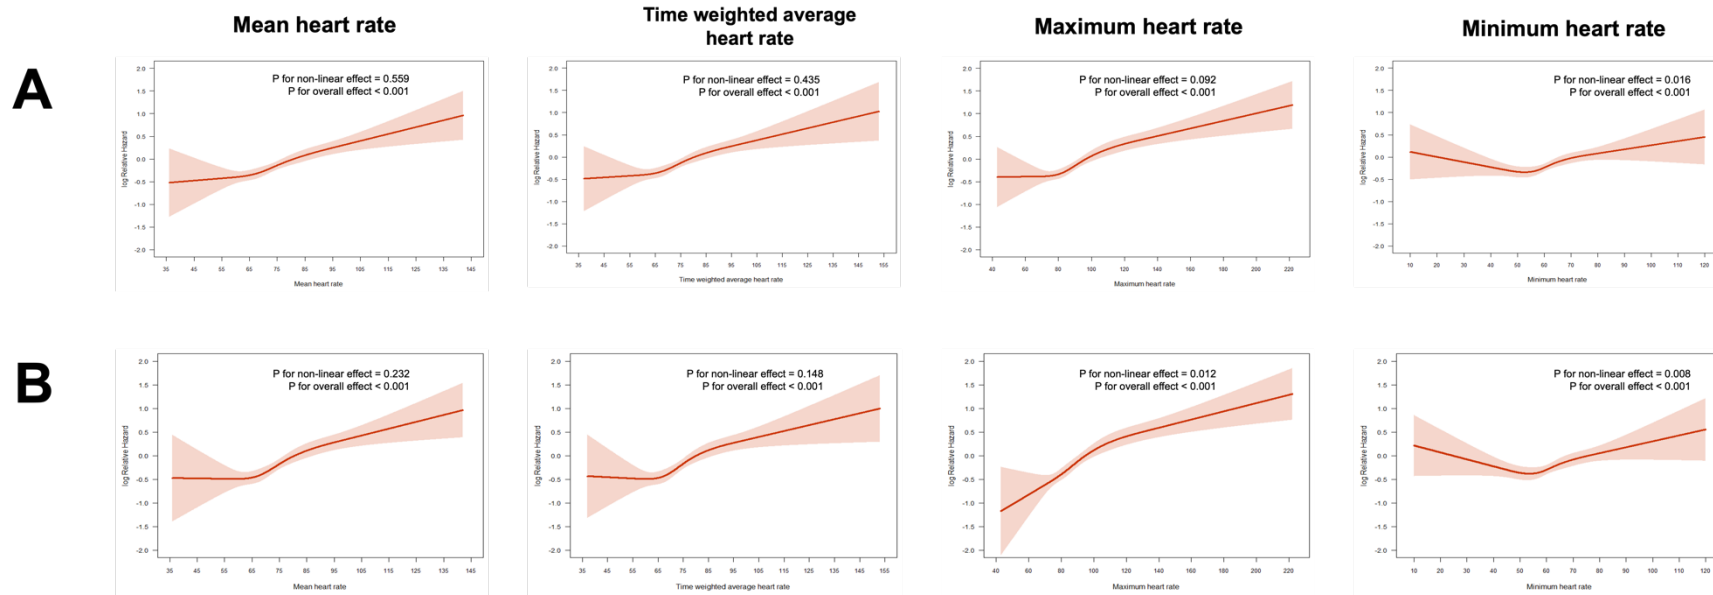

Supplement: JAH3-11-e025861-s001.pdf [file JAH3-11-e025861-s001.pdf]
